# Supplementary material
Source: publisher figshare collection journal article supplement (https://acs.figshare.com/ndownloader/files/21087987)
Supplement: Supplementary file 1 [file 21087987]

## Supplementary Information

# Controlled synthesis of $\text{Sb}_2(\text{S}_{1-x}\text{Se}_x)_3$ ( $0 \leq x \leq 1$ ) Solid Solution and the Effect of Composition Variation on Eletrocatalytic Energy Conversion and Storage

Malik Dilshad Khan,<sup>1\*</sup> Saif Ullah Awan,<sup>2</sup> Camila Zequine,<sup>3</sup> Chunyang Zhang,<sup>3</sup> Ram K. Gupta,<sup>3</sup> and Neerish Revaprasadu<sup>1\*</sup>

<sup>1</sup>Department of Chemistry, University of Zululand, Private Bag X1001, KwaDlangezwa 3886, South Africa.

<sup>2</sup>Department of Electrical Engineering, NUST College of Electrical and Mechanical Engineering, National University of Sciences and Technology (NUST) Islamabad 44000, Pakistan.

<sup>3</sup>Department of Chemistry, Pittsburg State University, Pittsburg, KS 66762, USA.

### Corresponding Authors

\*Email: RevaprasaduN@unizulu.ac.za

\*Email: malikdilshad@hotmail.com

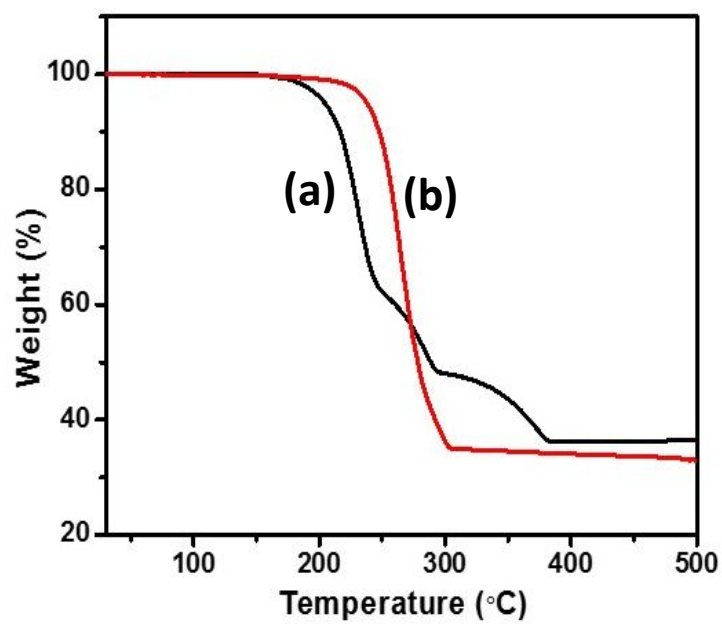

Figure S1. Thermogravimetric analysis of (a) complex (1) and (b) complex (2).

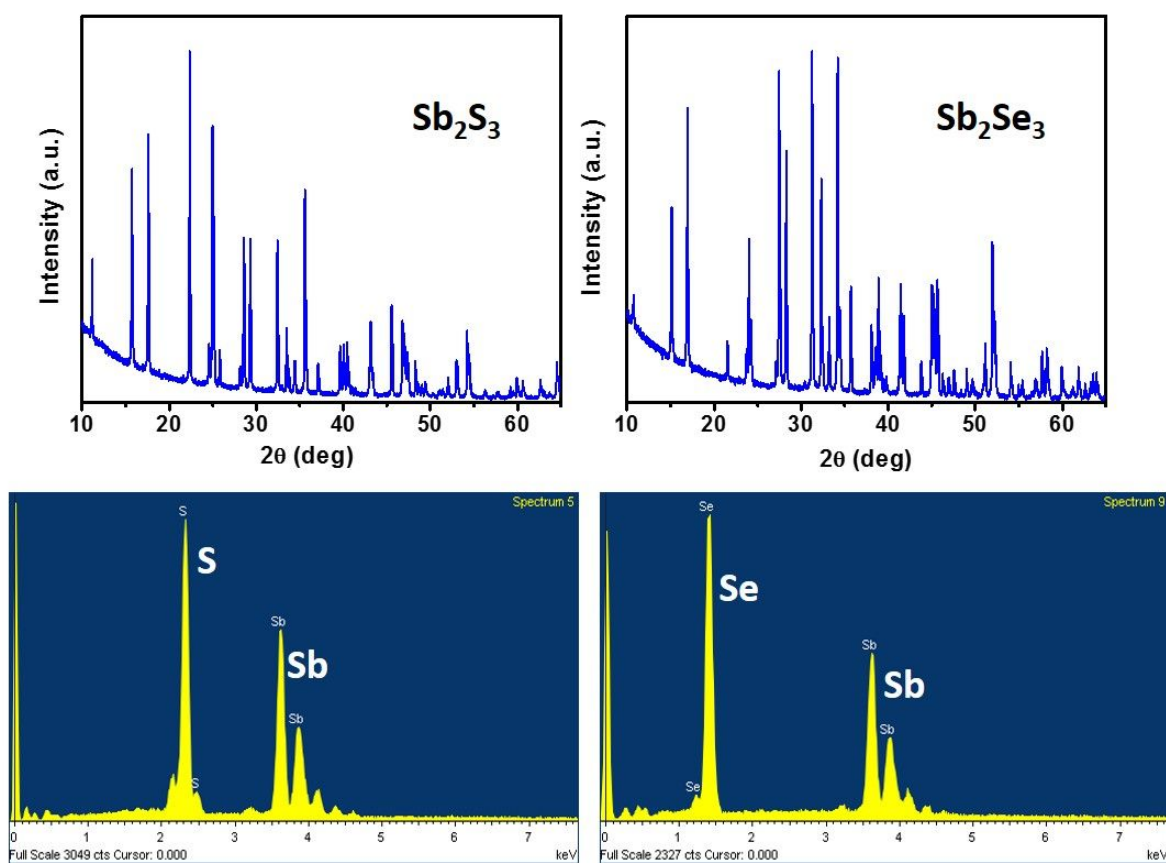

Figure S2. Diffraction pattern of  $\text{Sb}_2\text{S}_3$  and  $\text{Sb}_2\text{Se}_3$ , obtained from decomposition of *tris*(thiobenzoato) $\text{Sb(III)}$  and *tris*(selenobenzoato) $\text{Sb(III)}$ , respectively.

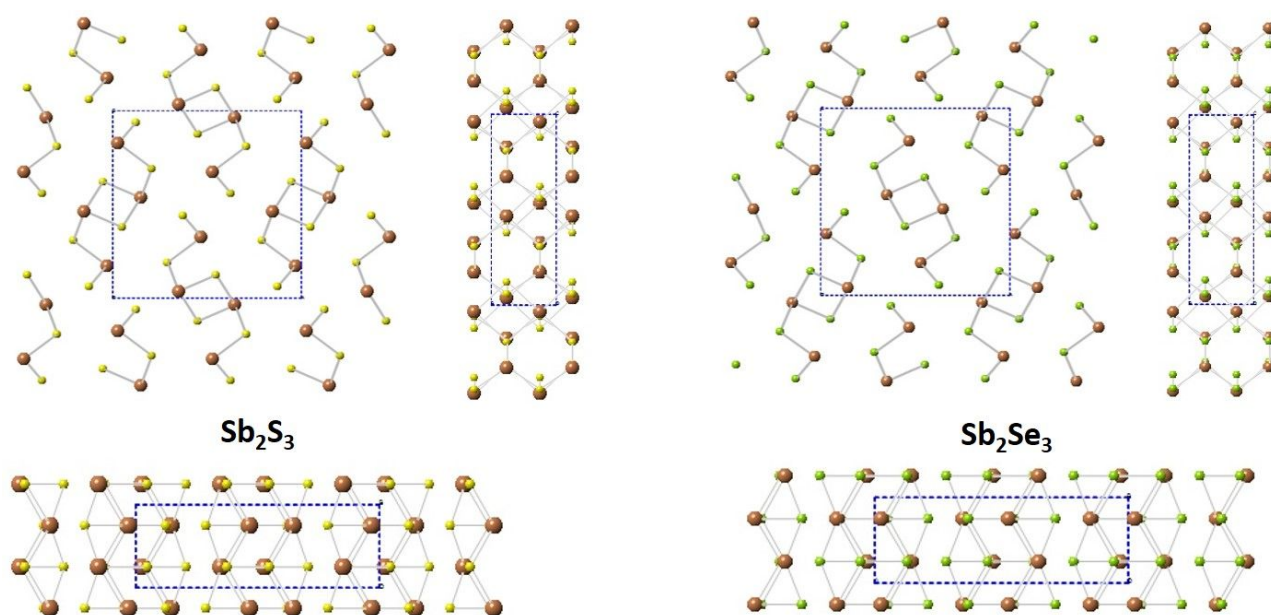

Figure S3. Crystal structure of  $\text{Sb}_2\text{S}_3$  and  $\text{Sb}_2\text{Se}_3$  viewed along different axis.

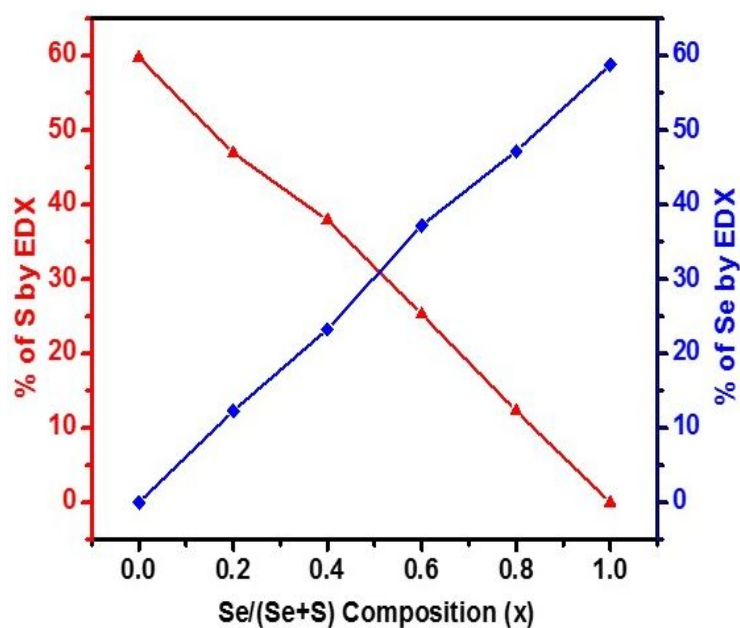

Figure S4. Plot showing change in concentration of Selenium and Sulfur content against  $\text{Se}/(\text{Se}+\text{S})$  composition.

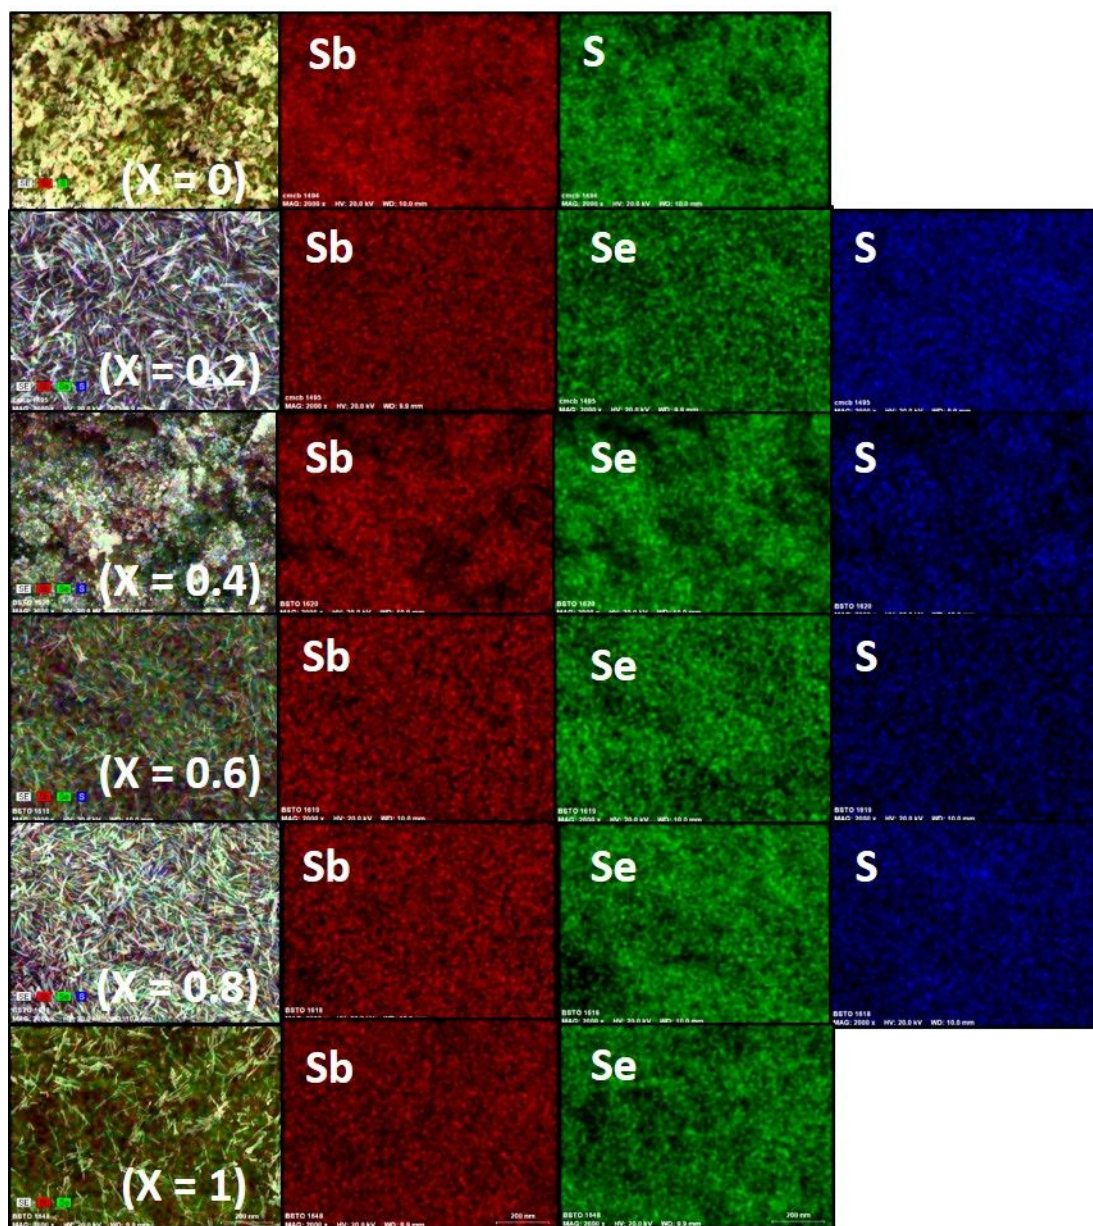

Figure S5. Elemental mapping of samples with different selenium concentration, showing uniform distribution of antimony, sulfur and selenium.



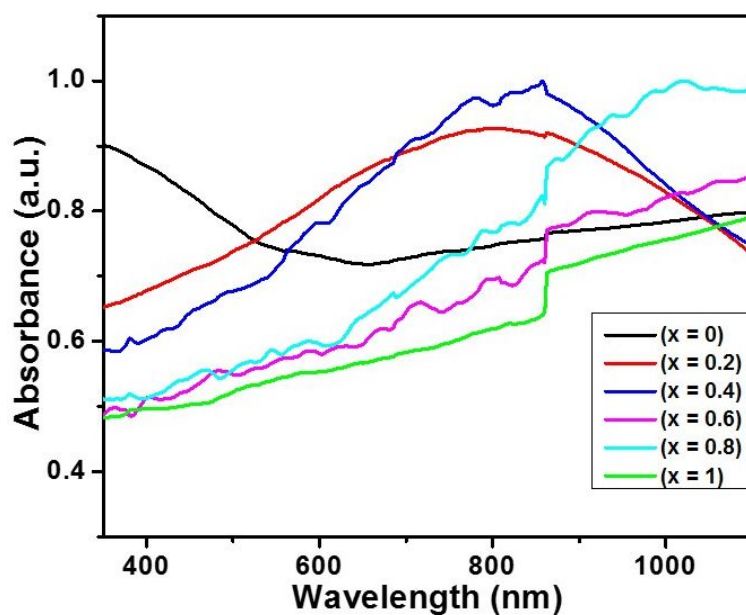

Figure S6. UV-Vis-NIR spectroscopic analysis of the binary and ternary nanomaterials with different stoichiometry of  $\text{Sb}_2(\text{S}_{1-x}\text{Se}_x)_3$  (where  $0 \leq x \leq 1$ ), indicating shift in absorption peaks.

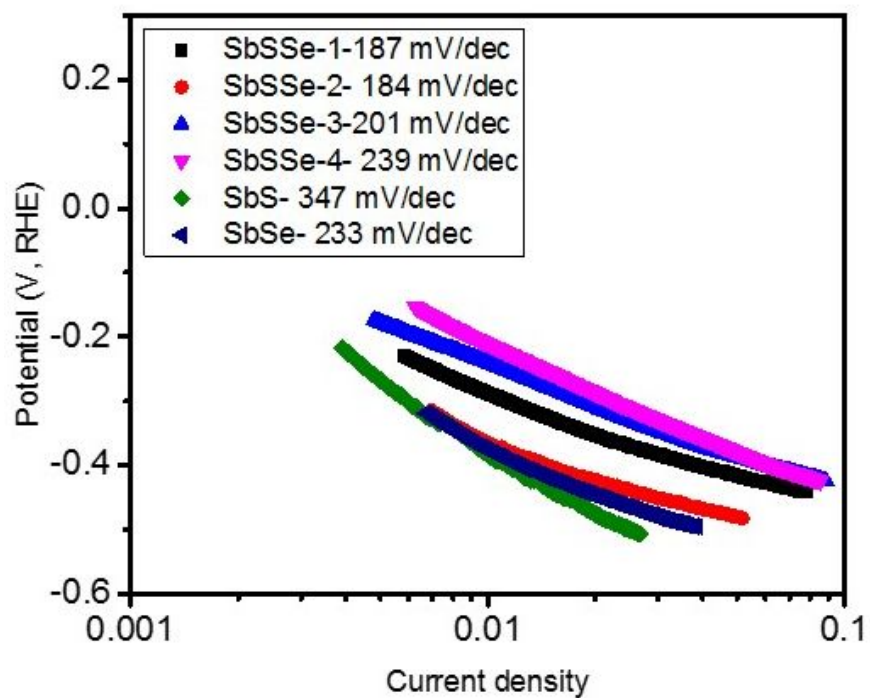

Figure S7. Tafel slopes of all  $\text{Sb}_2(\text{S}_{1-x}\text{Se}_x)_3$  (where  $0 \leq x \leq 1$ ), samples.

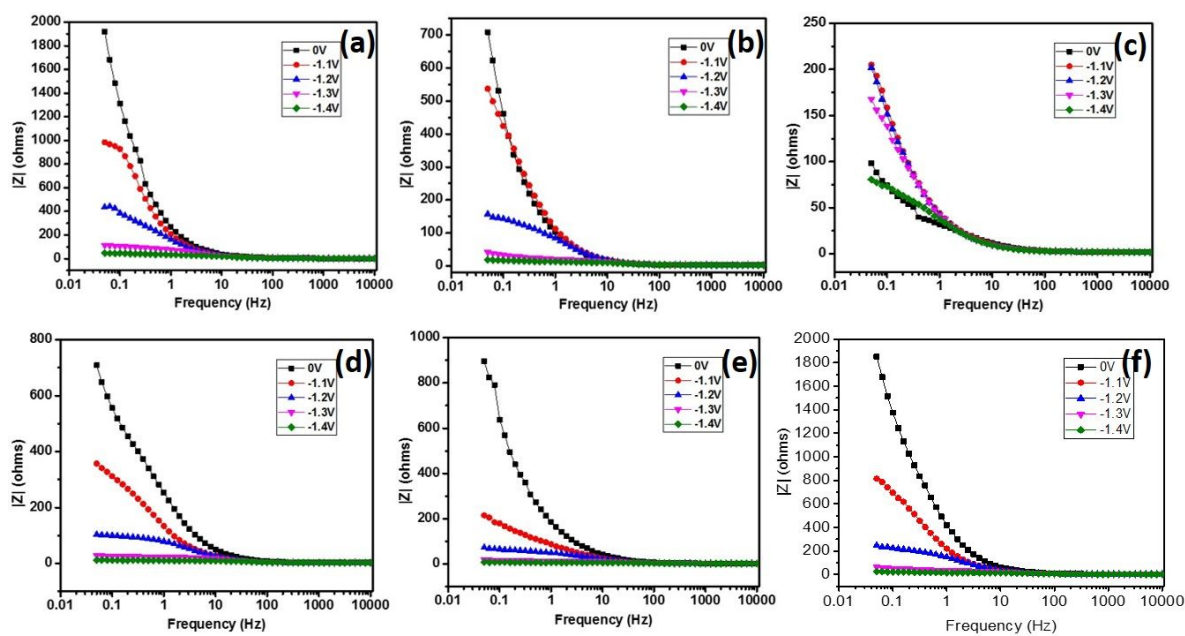

Figure S8.  $|Z|$  vs. frequency plots for (a) SbS, (b) SbSSe-1, (c) SbSSe-2, (d) SbSSe-3, (e) SbSSe-4 and (f) SbSe samples.
